# Supplementary material for: An amide functionalized calix-benzocrown-6 ionophore for the selective extraction of cesium from highly concentrated nitric acid: the effect of intramolecular buffering
Source: Royal Society of Chemistry journal article supplement (doi:10.1039/c3ra44985h), 2013-10-08

Supplementary Information Figure Caption:

Fig S-1:  $^1\text{H}$  NMR of CBCA-7

Fig S-2:  $^{13}\text{C}$  NMR of CBCA-7

Fig S-3: ESI-MS spectra of CBCA-7

Fig S-4:  $^1\text{H}$  NMR of CBCA-8

Fig S-5:  $^{13}\text{C}$  NMR of CBCA-8

Fig S-6: ESI-MS spectra of CBCA-8

Fig S-7:  $^1\text{H}$  NMR of CBCA-9

Fig S-8:  $^{13}\text{C}$  NMR of CBCA-9

Fig S-9: ESI-MS spectra of CBCA-9

Fig S-10: Distribution Coefficients of Cesium as a function initial nitric acid concentration.(organic phase 0.01 M ligand /30 % o-NPHE/n-dodecane and aqueous phase ~300 ppm cesium at varying nitric acid concentration)

Fig S-11: Extraction of nitric acid at different nitric acid concentrations with and without ligand in 30% o-NPHE solvent system.

Fig S-1: <sup>1</sup>H NMR of CBCA-7

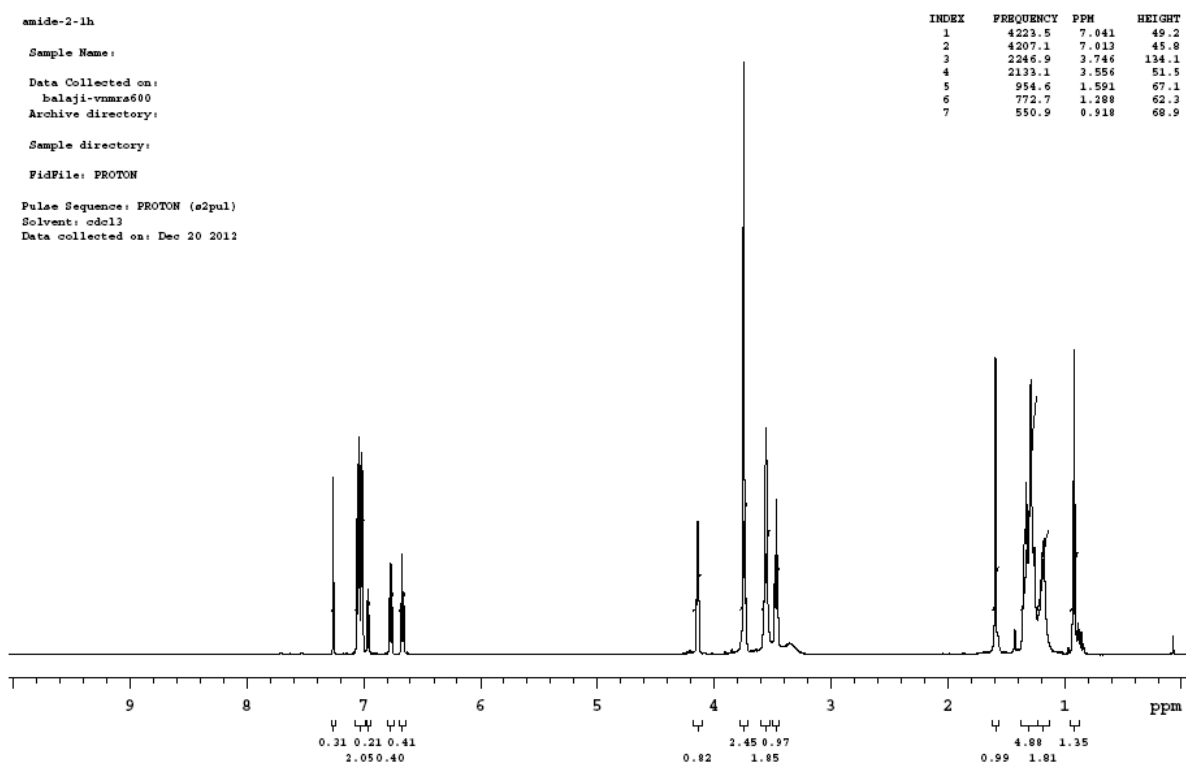

Fig S-2:  $^{13}\text{C}$  NMR of CBCA-7

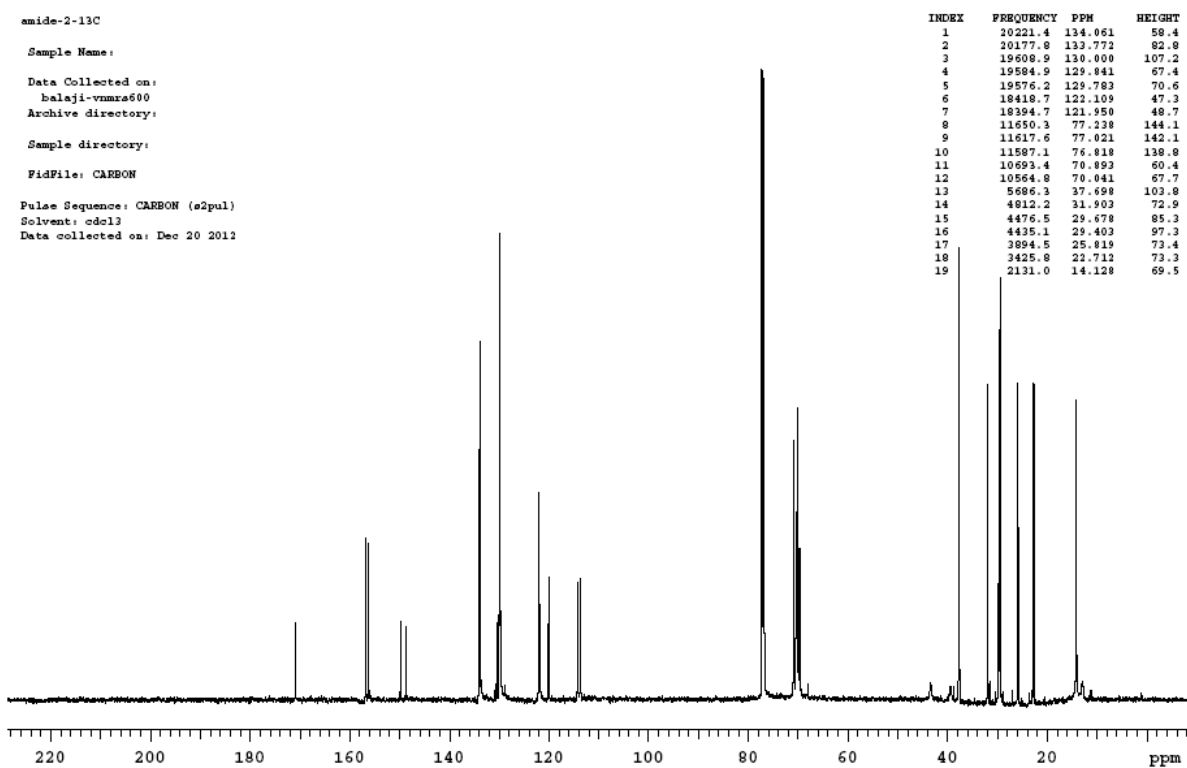

Fig S-3: ESI-MS spectra of CBCA-7

Spectrum Plot - 11/1/2012 4:56 PM

1 A Scan 37 from c:\at\2012-2013\external\barc-vikas\sample-1-.xms

Spectrum 1A  
BP: 1000.6 (4.543e+6=100%), sample-1-.xms

0.616 min. Scan: 37, 100-2000, Ion: 1145 us, RIC: 3.245e+7

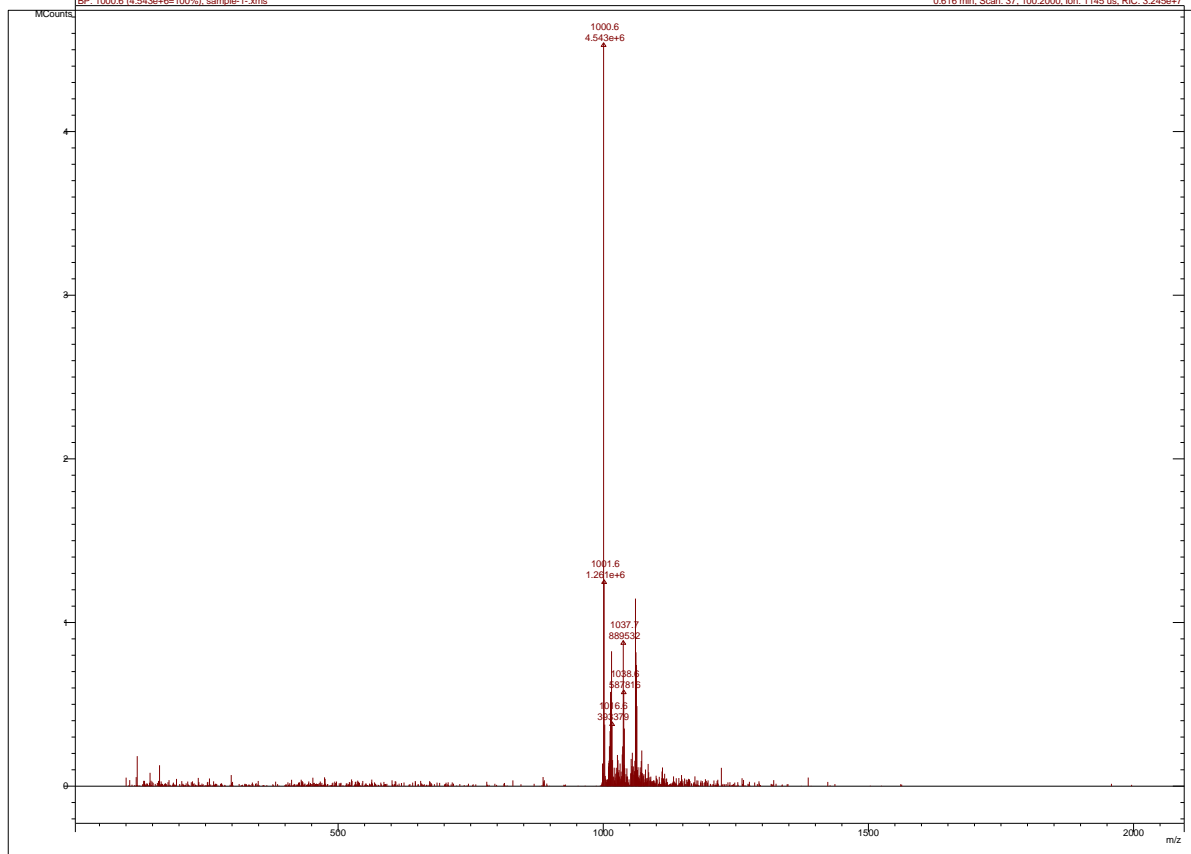

Fig S-4: <sup>1</sup>H NMR of CBCA-8

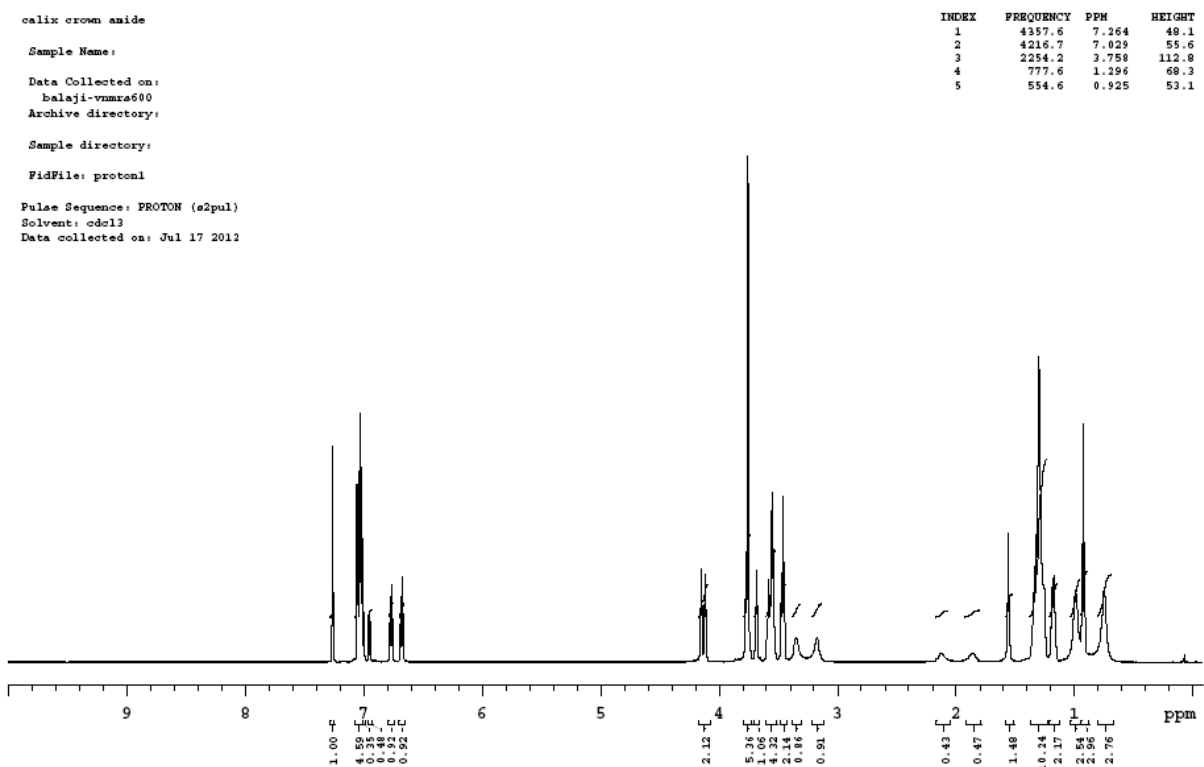

Fig S-5:  $^{13}\text{C}$  NMR of CBCA-8

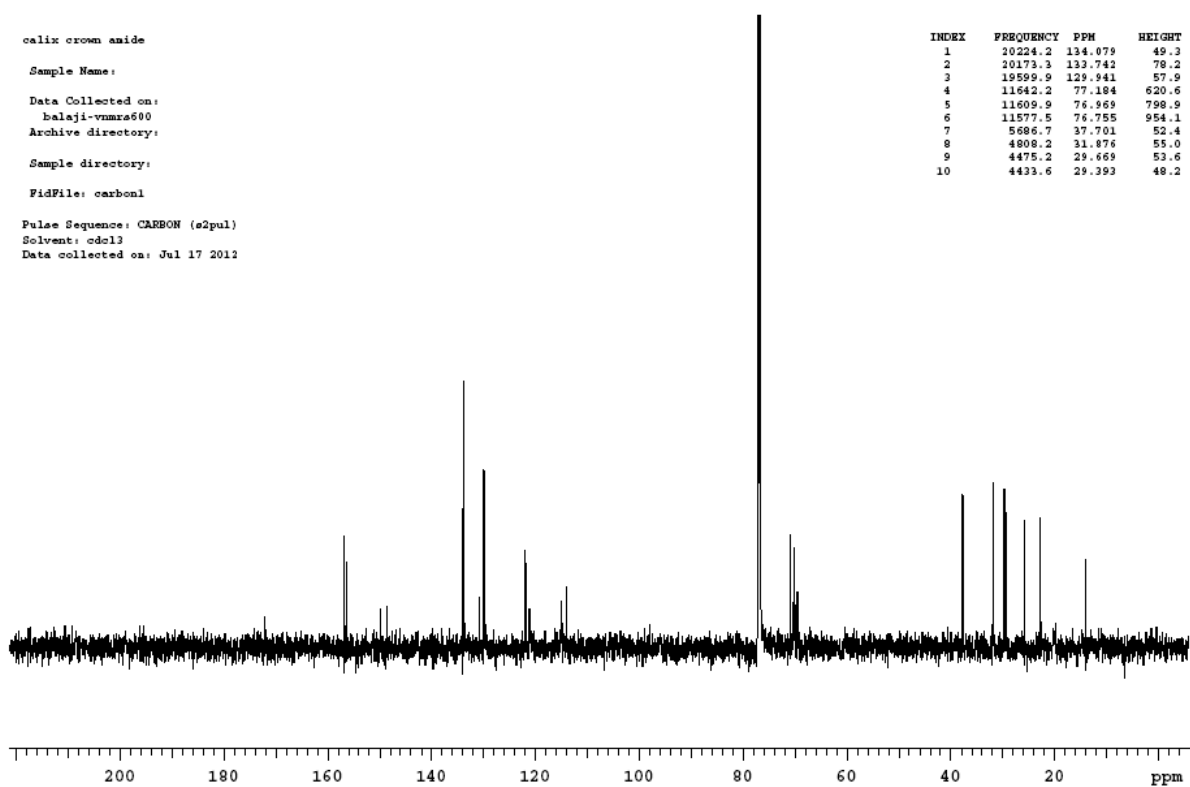

Fig S-6: ESI-MS spectra of CBCA-8

Spectrum Plot - 6/15/2012 10:50 AM

1 A Scan 3 from c:\it(2012-2013\external\lcms-67\1-1055.xms

Spectrum 1A  
BP: 1055.0 (567000=100%), s-1-1055.xms

0.040 min, Scan: 3, 100-2000, Ion: 25085 us, RIC: 2.496e+6

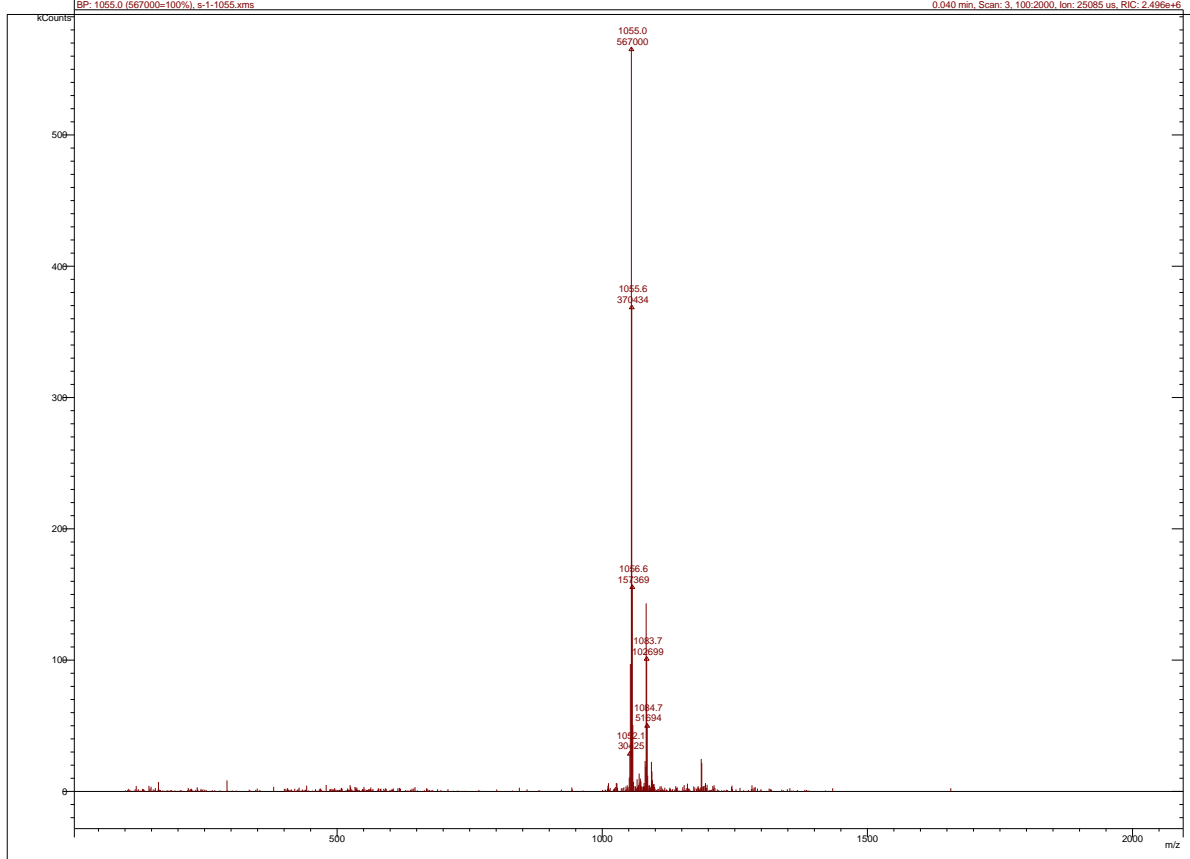

Fig S-7: <sup>1</sup>H NMR of CBCA-9

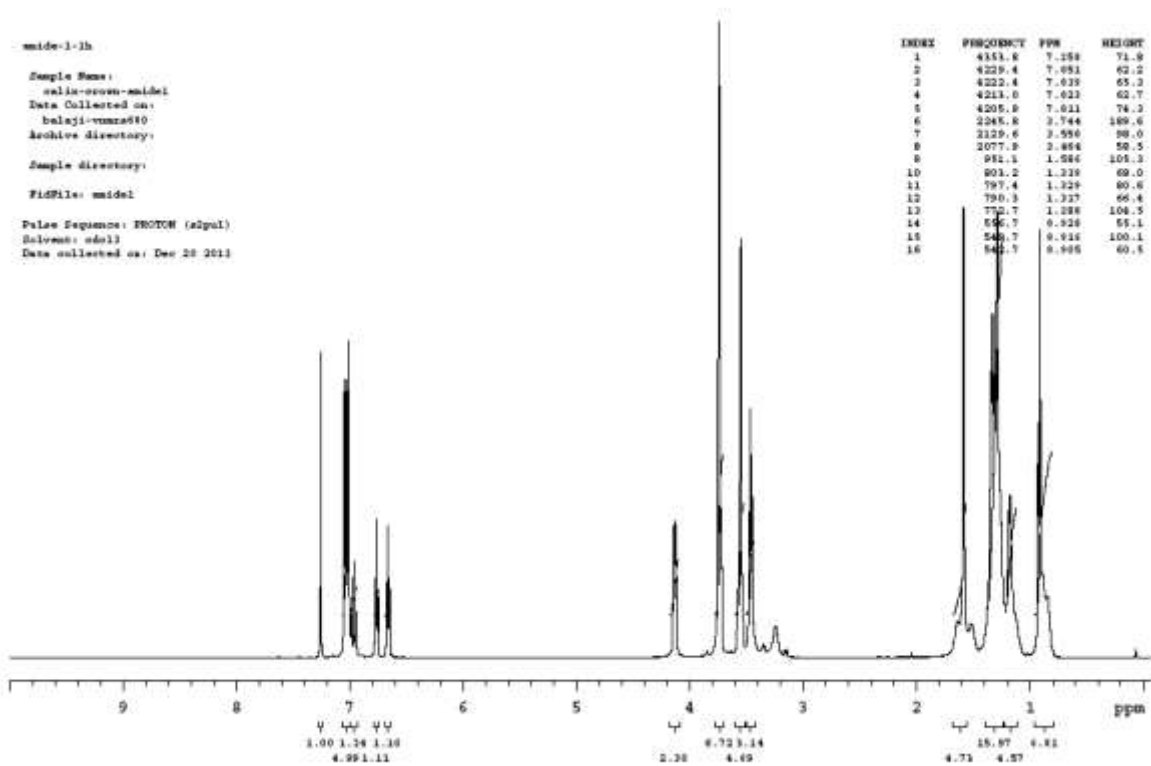



Fig S-8:  $^{13}\text{C}$  NMR of CBCA-9

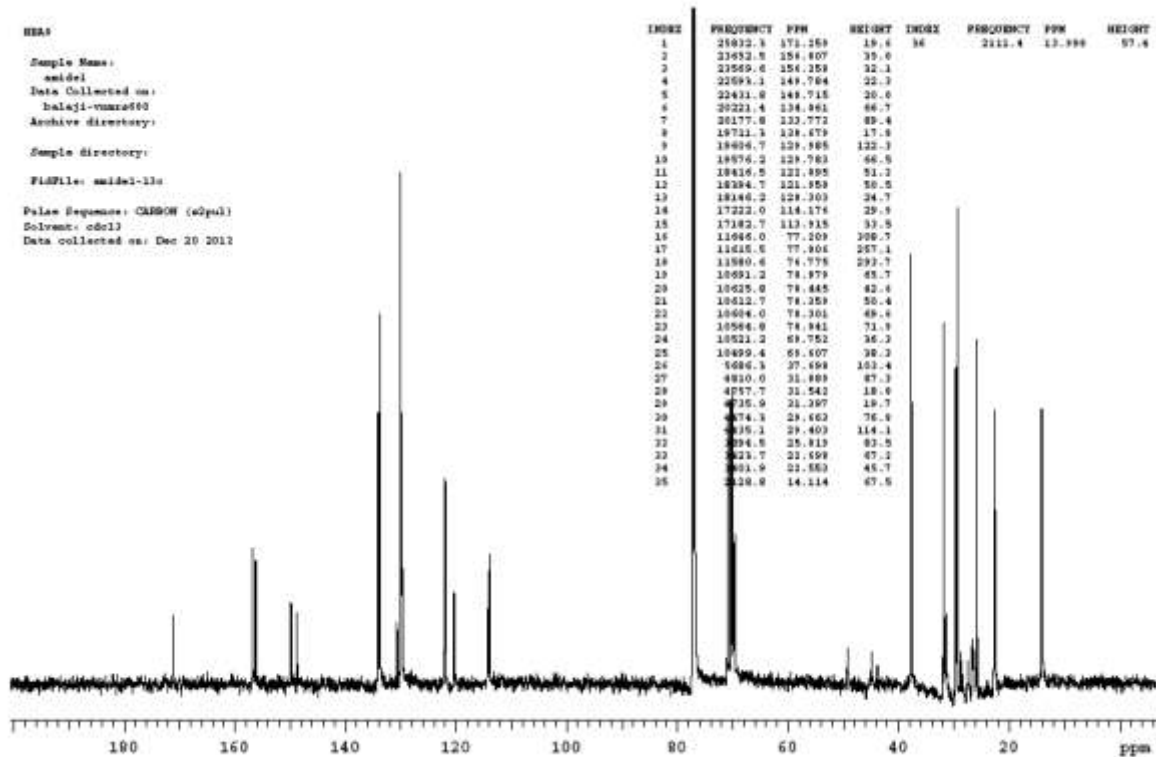

Fig S-9: ESI-MS spectra of CBCA-9

Spectrum Plot - 11/1/2012 5:03 PM

1 A Scan 7 from c:\it\2012-2013\external\baro-vikas\sample-5-1111.xmls

Spectrum 1A  
BP: 1110.9 (5392=100%), sample-5-1111.xmls

0.296 min, Scan: 7, 100:1500, Ion: 250000 us, RIC: 48800

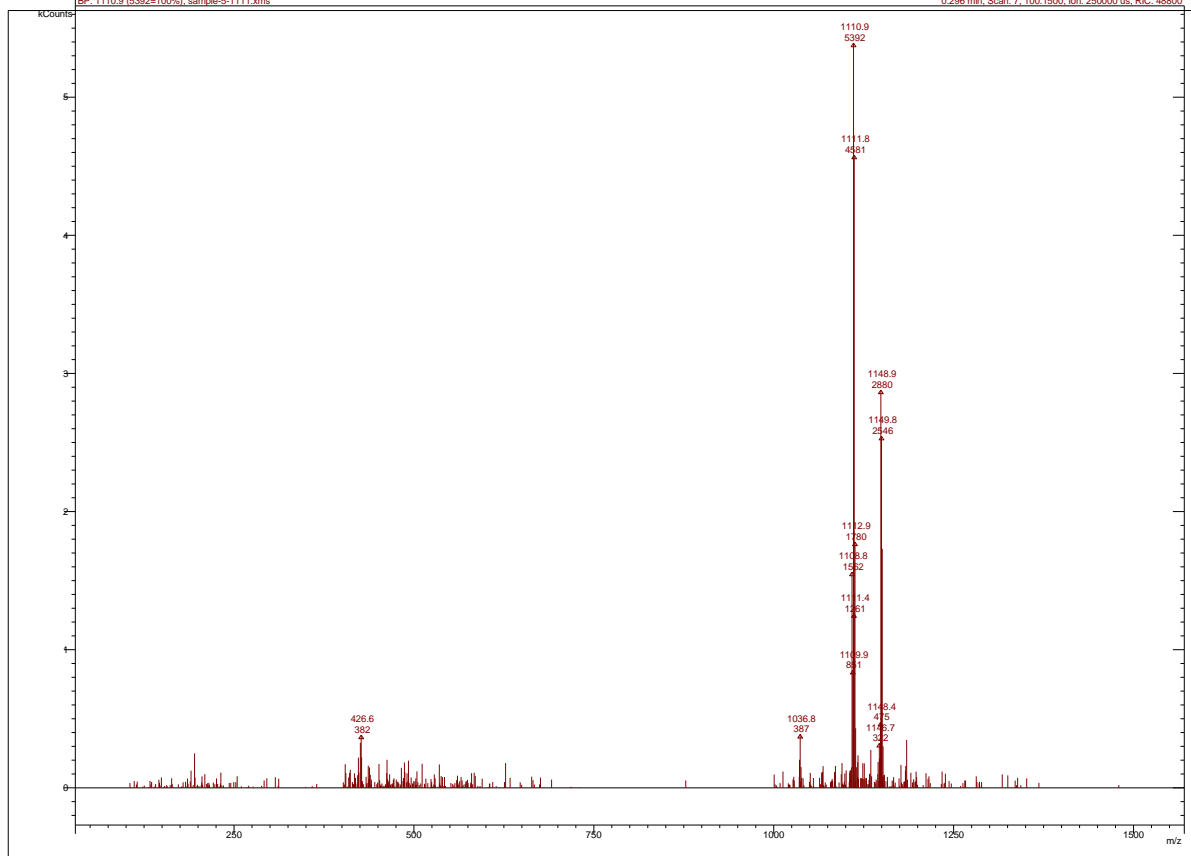

Fig S-10: Distribution Coefficients of Cesium as a function initial nitric acid concentration.(organic phase 0.01 M ligand /30 % o-NPHE/n-dodecane and aqueous phase ~300 ppm Cs at varying nitric acid concentration)

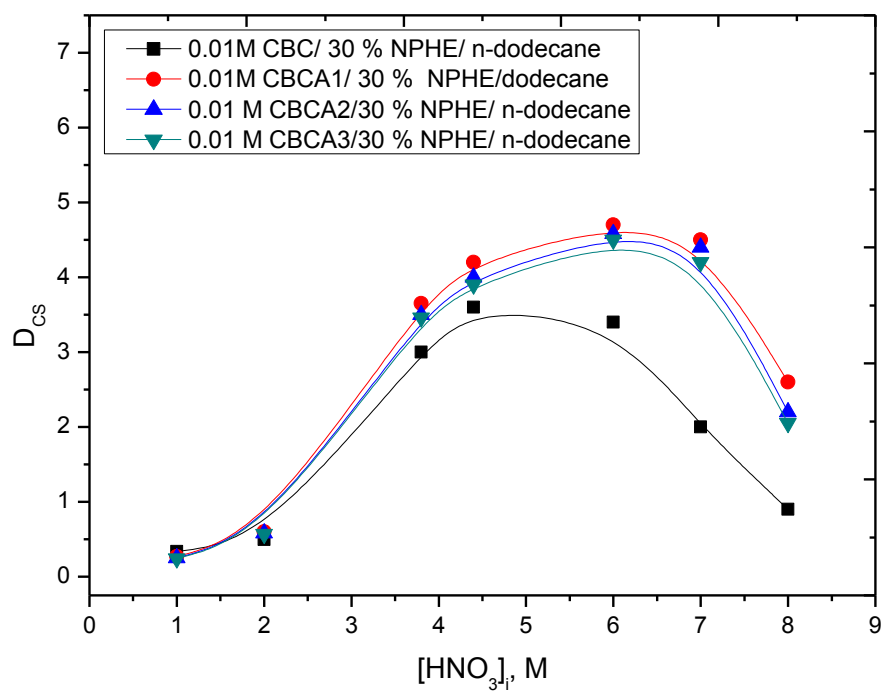

Fig S-11: Extraction of nitric acid at different nitric acid concentrations with and without ligand in 30% o-NPHE solvent system.

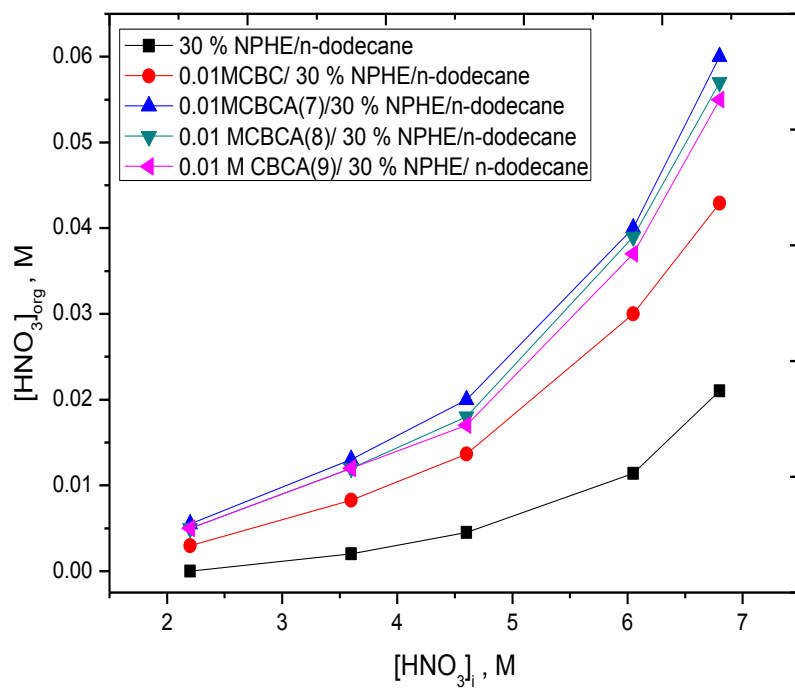

Supplement: c3ra44985h.pdf [file c3ra44985h.pdf]
